# Supplementary material for: Functionalization of C–H bonds in acetophenone oximes with arylacetic acids and elemental sulfur
Source: Royal Society of Chemistry journal article supplement (doi:10.1039/d0ra00808g), 2020-01-01

**Functionalization of C–H bonds in Acetophenone Oximes with Arylacetic  
Acids and Elemental Sulfur**

Phuc H. Pham,<sup>†,§</sup> Khang X. Nguyen,<sup>†,§</sup> Hoai T. B. Pham,<sup>†,‡</sup> Thien T. Tran,<sup>†</sup> Tung T.

Nguyen<sup>\*,†</sup>, Nam T. S. Phan<sup>\*,†</sup>

<sup>†</sup>Faculty of Chemical Engineering, HCMC University of Technology, VNU-HCM, 268

Ly Thuong Kiet, District 10, Ho Chi Minh City, Vietnam

<sup>‡</sup>Department of Chemistry, University of Colorado Denver, Denver, CO 80204, USA

**Supporting information**

$^1\text{H}$  and  $^{13}\text{C}$  NMR spectra of **3aa**, Scheme 2

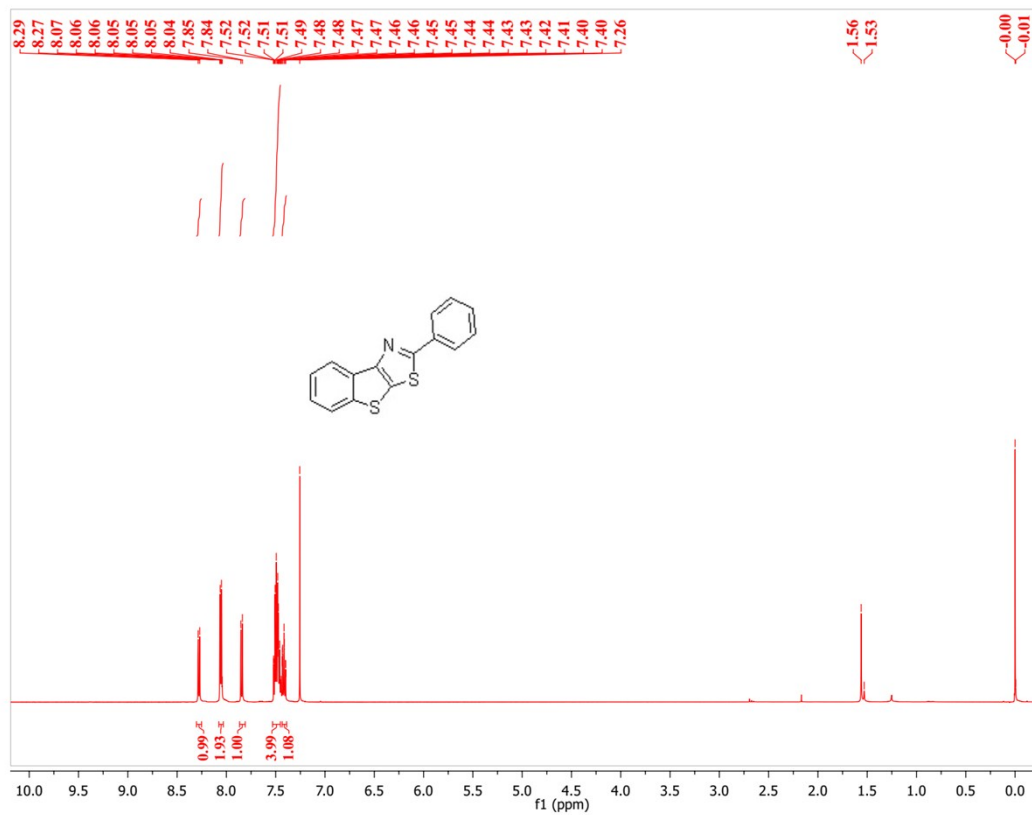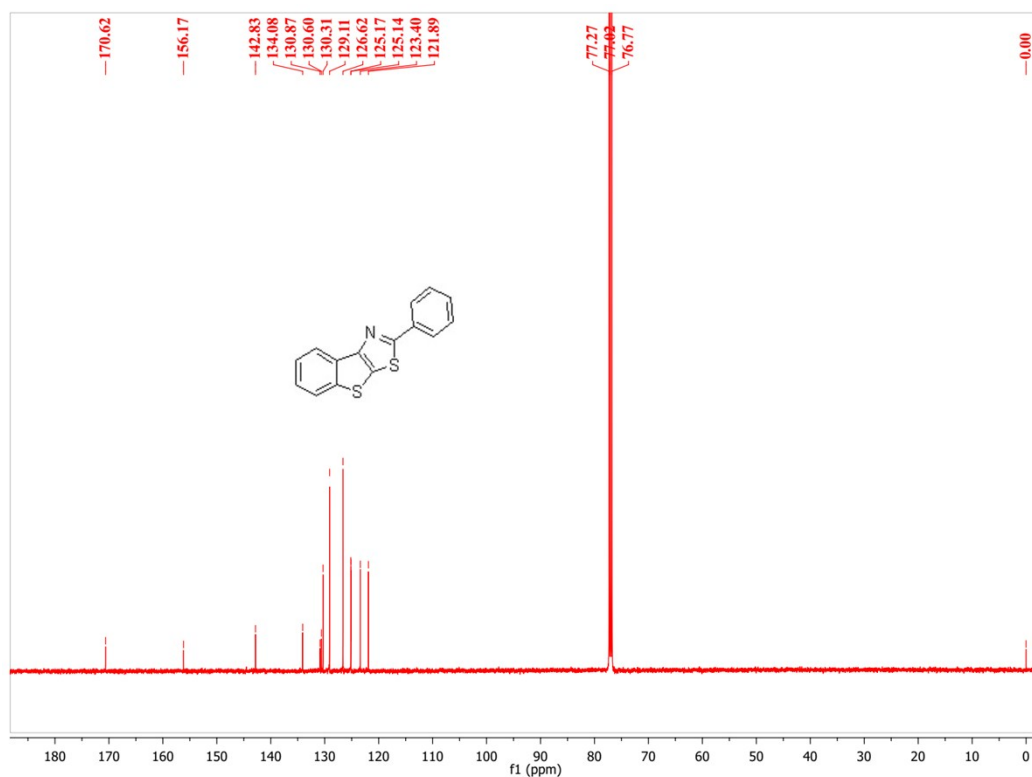

$^1\text{H}$  and  $^{13}\text{C}$  NMR spectra of **3ab**, Scheme 2

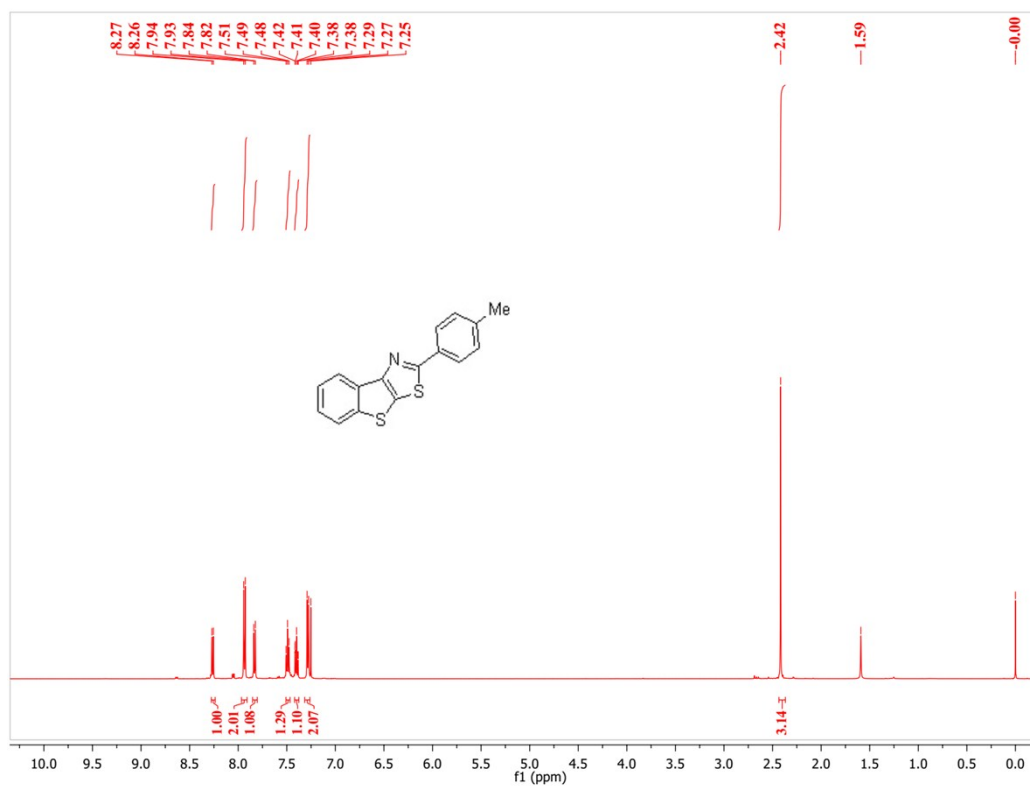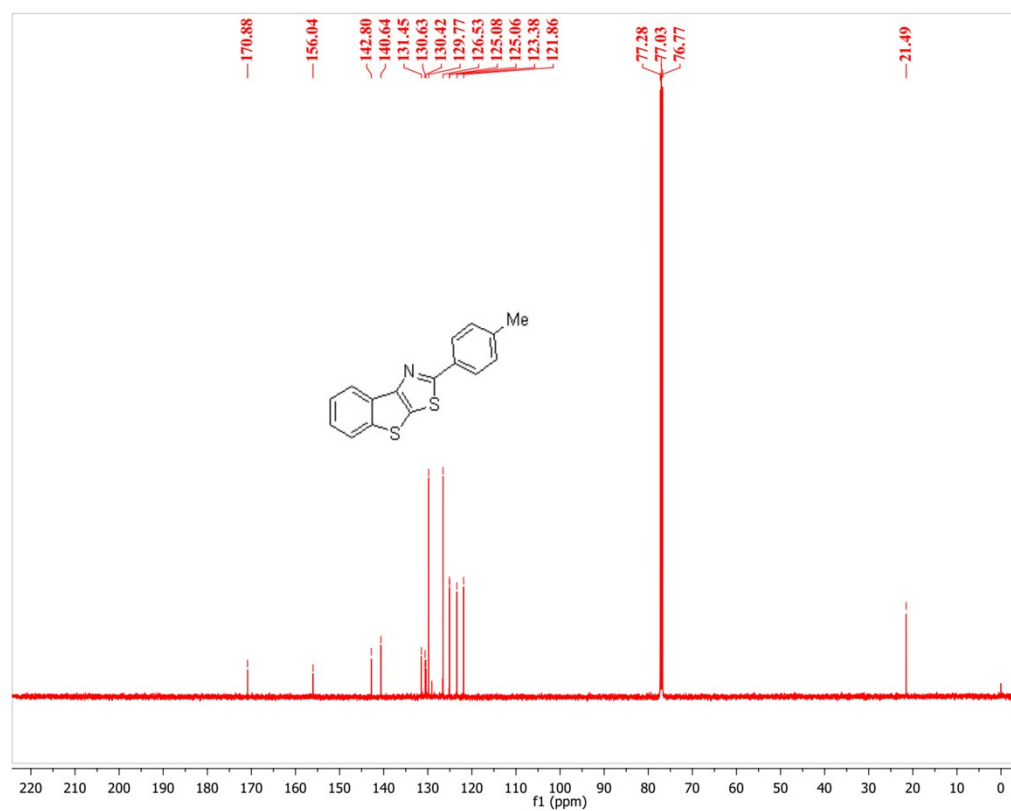

$^1\text{H}$  and  $^{13}\text{C}$  NMR spectra of **3ac**, Scheme 2

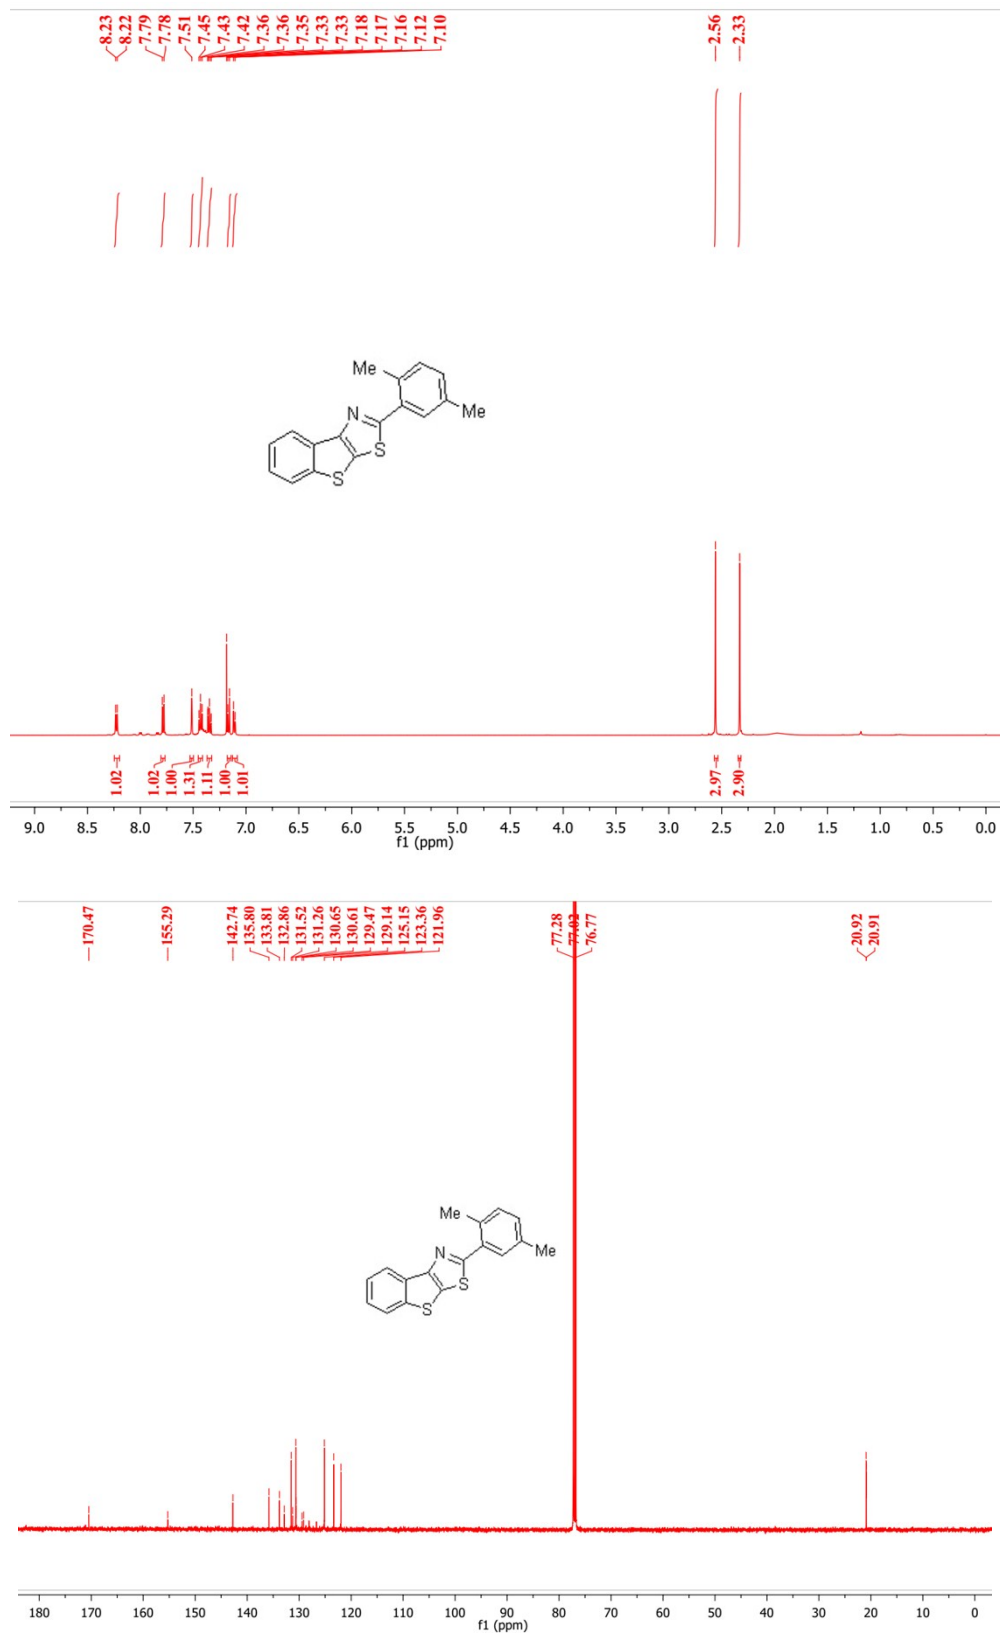

$^1\text{H}$  and  $^{13}\text{C}$  NMR spectra of **3ad**, Scheme 2

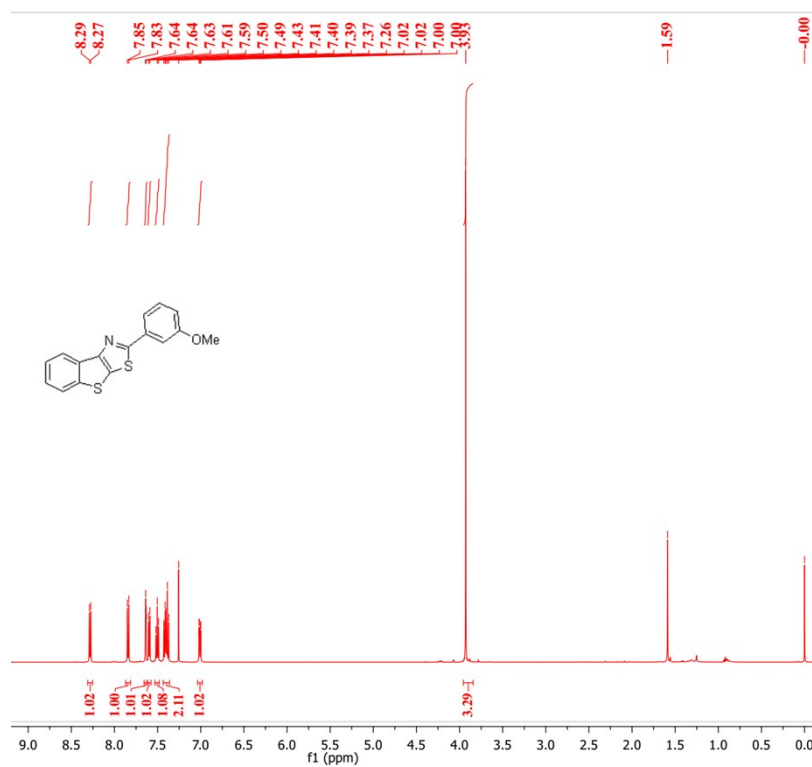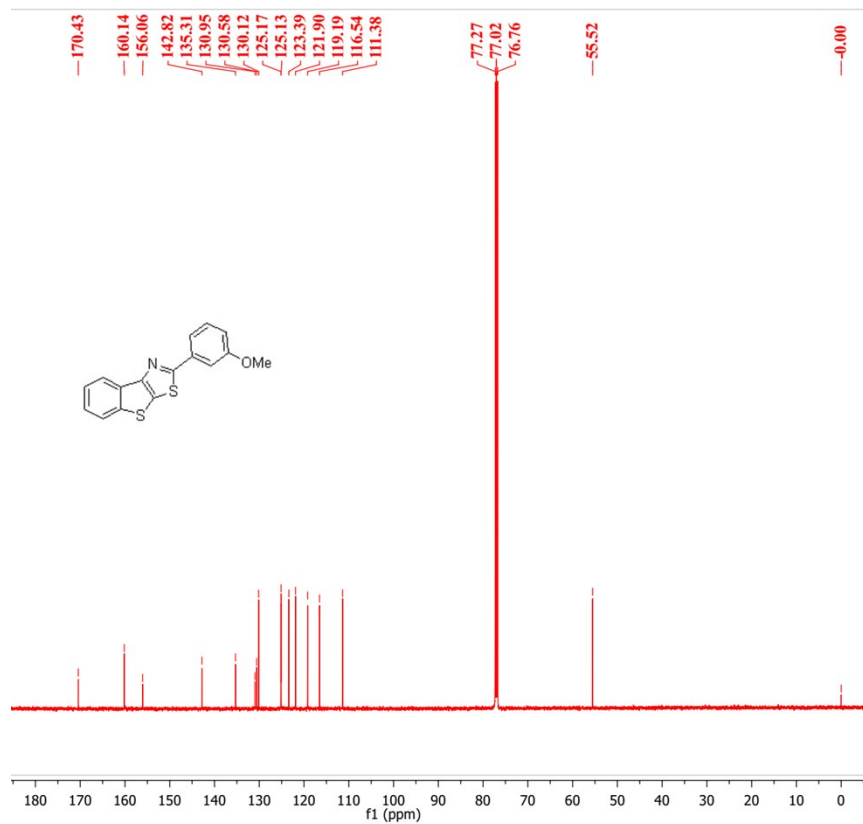

$^1\text{H}$  and  $^{13}\text{C}$  NMR spectra of **3ae**, Scheme 2

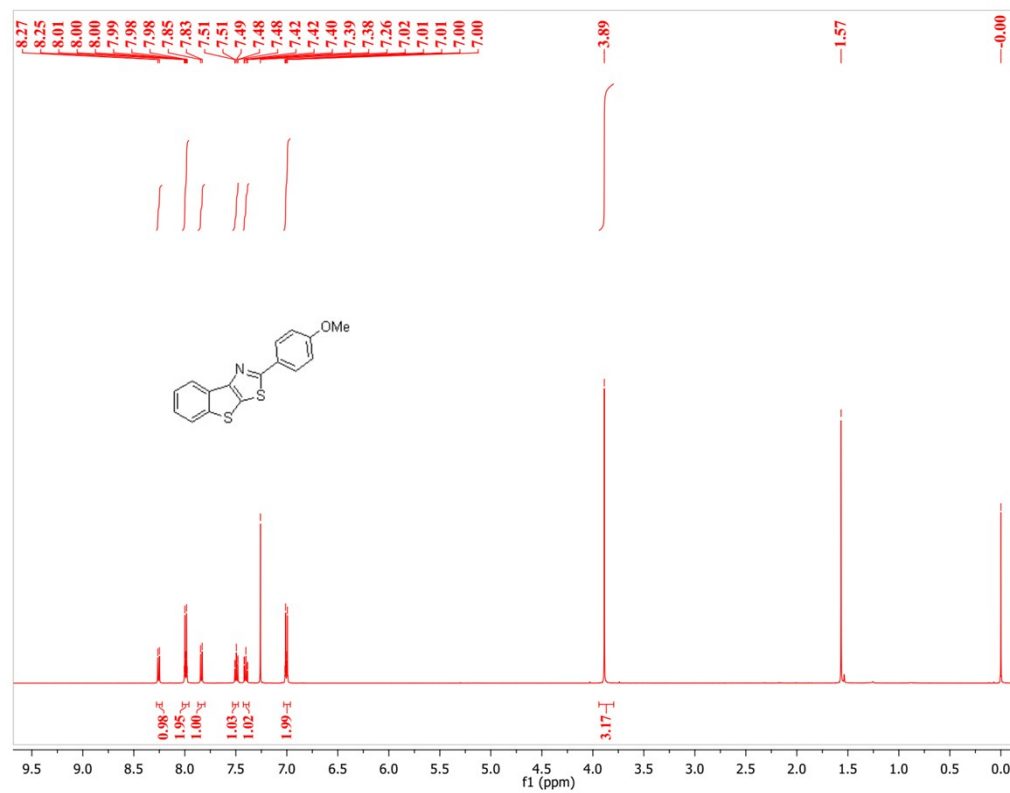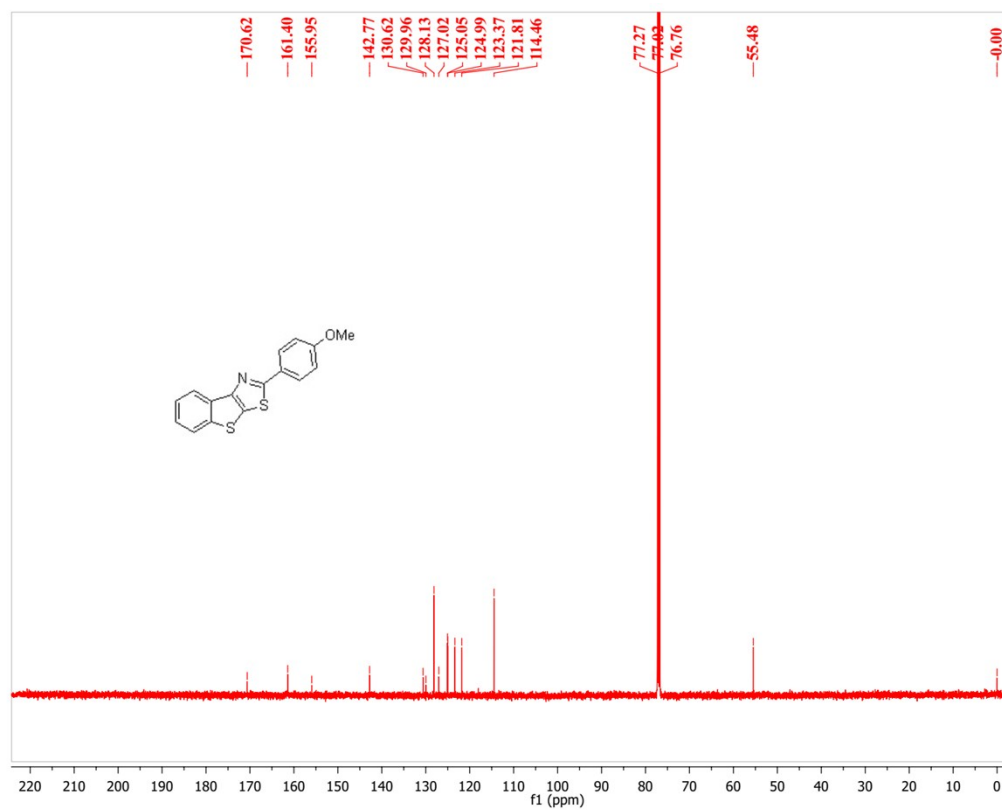

$^1\text{H}$  and  $^{13}\text{C}$  NMR spectra of **3af**, Scheme 2

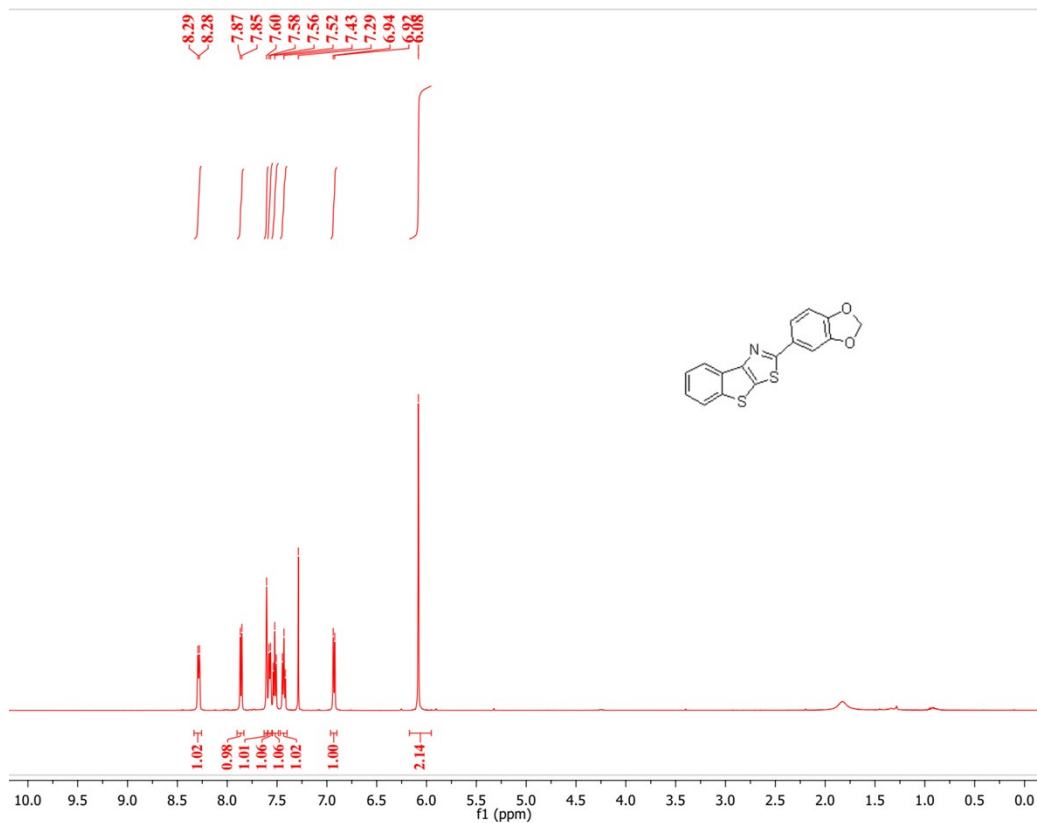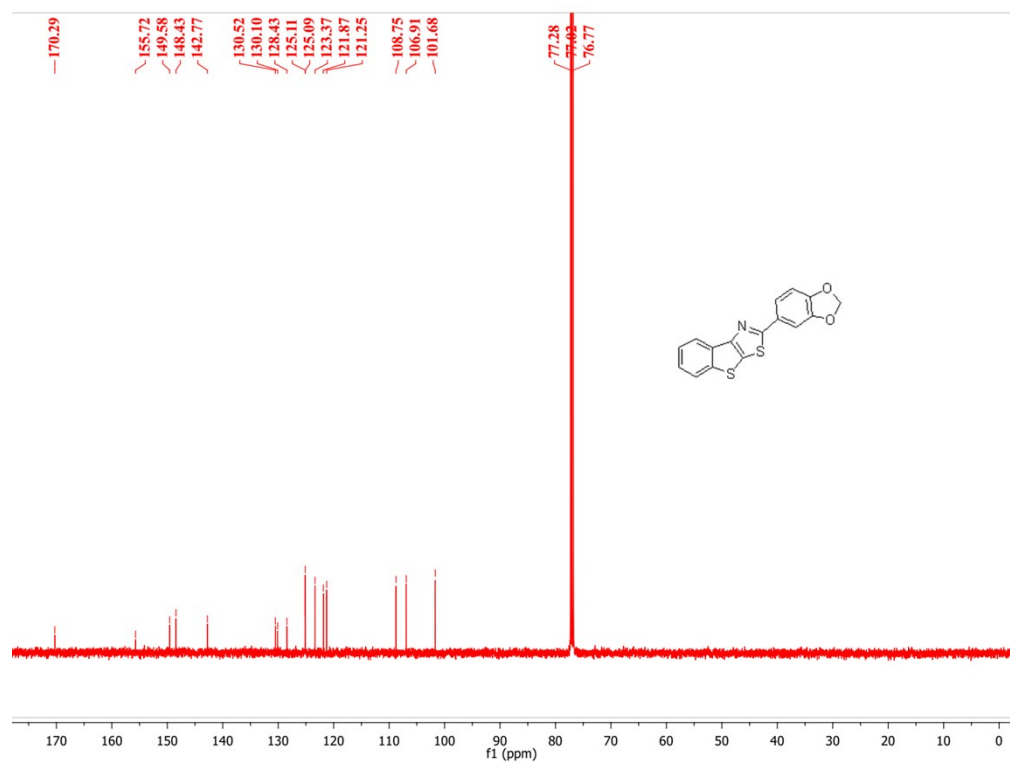

$^1\text{H}$  and  $^{13}\text{C}$  NMR spectra of **3ag**, Scheme 2

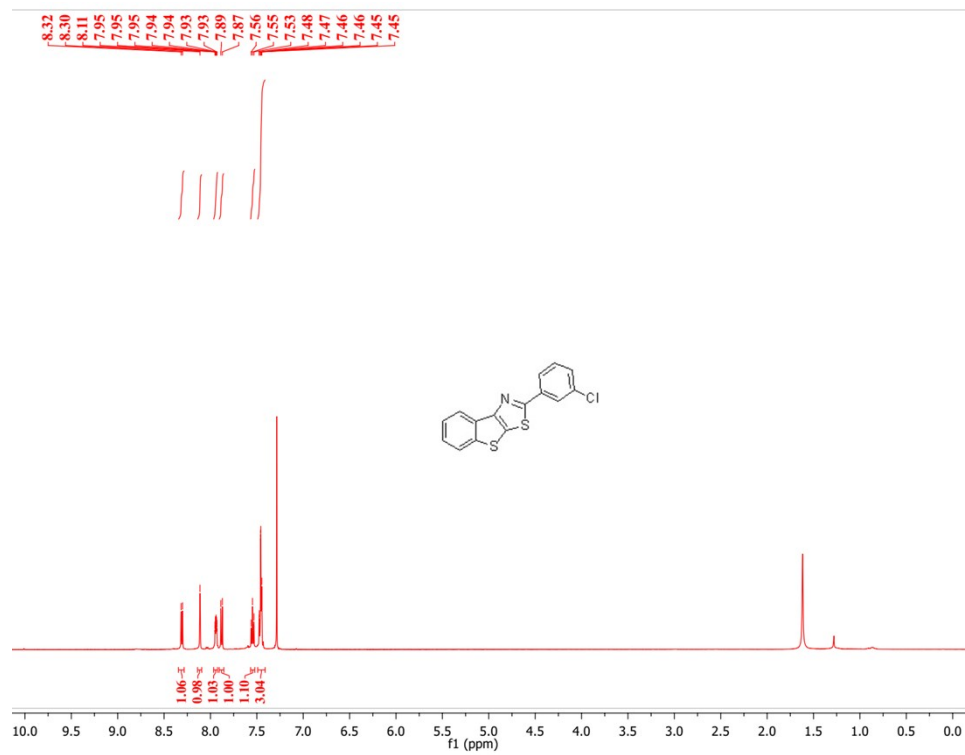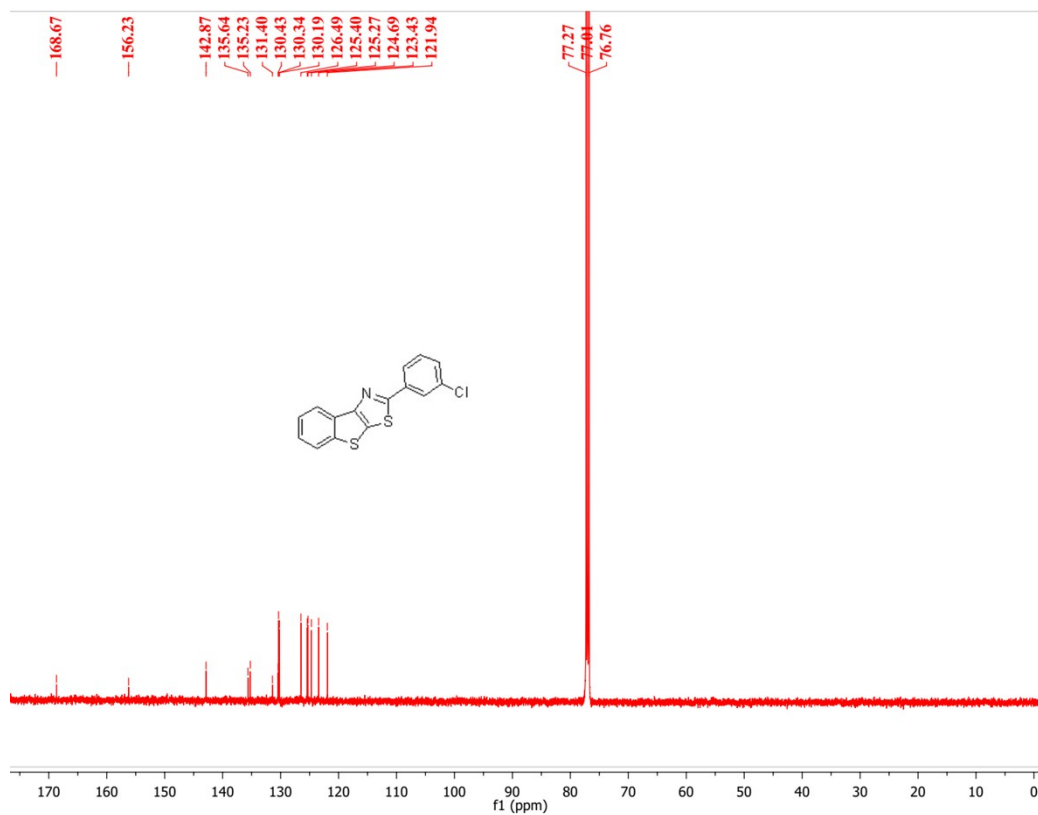



$^1\text{H}$  and  $^{13}\text{C}$  NMR spectra of **3ah**, Scheme 2

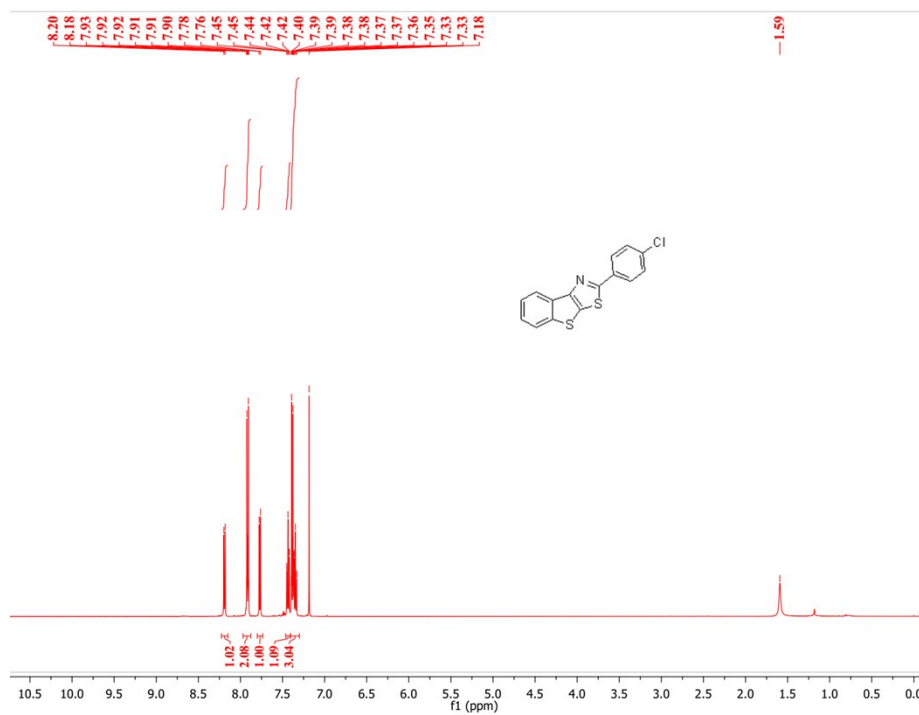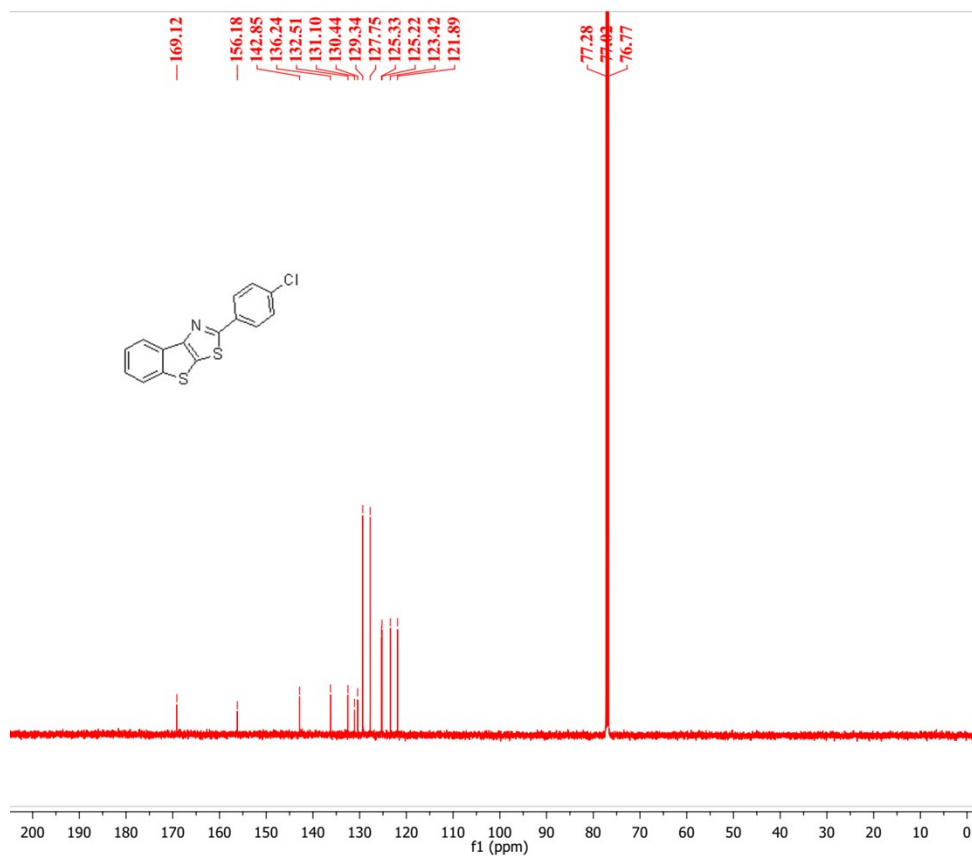

$^1\text{H}$  and  $^{13}\text{C}$  NMR spectra of **3ai**, Scheme 2

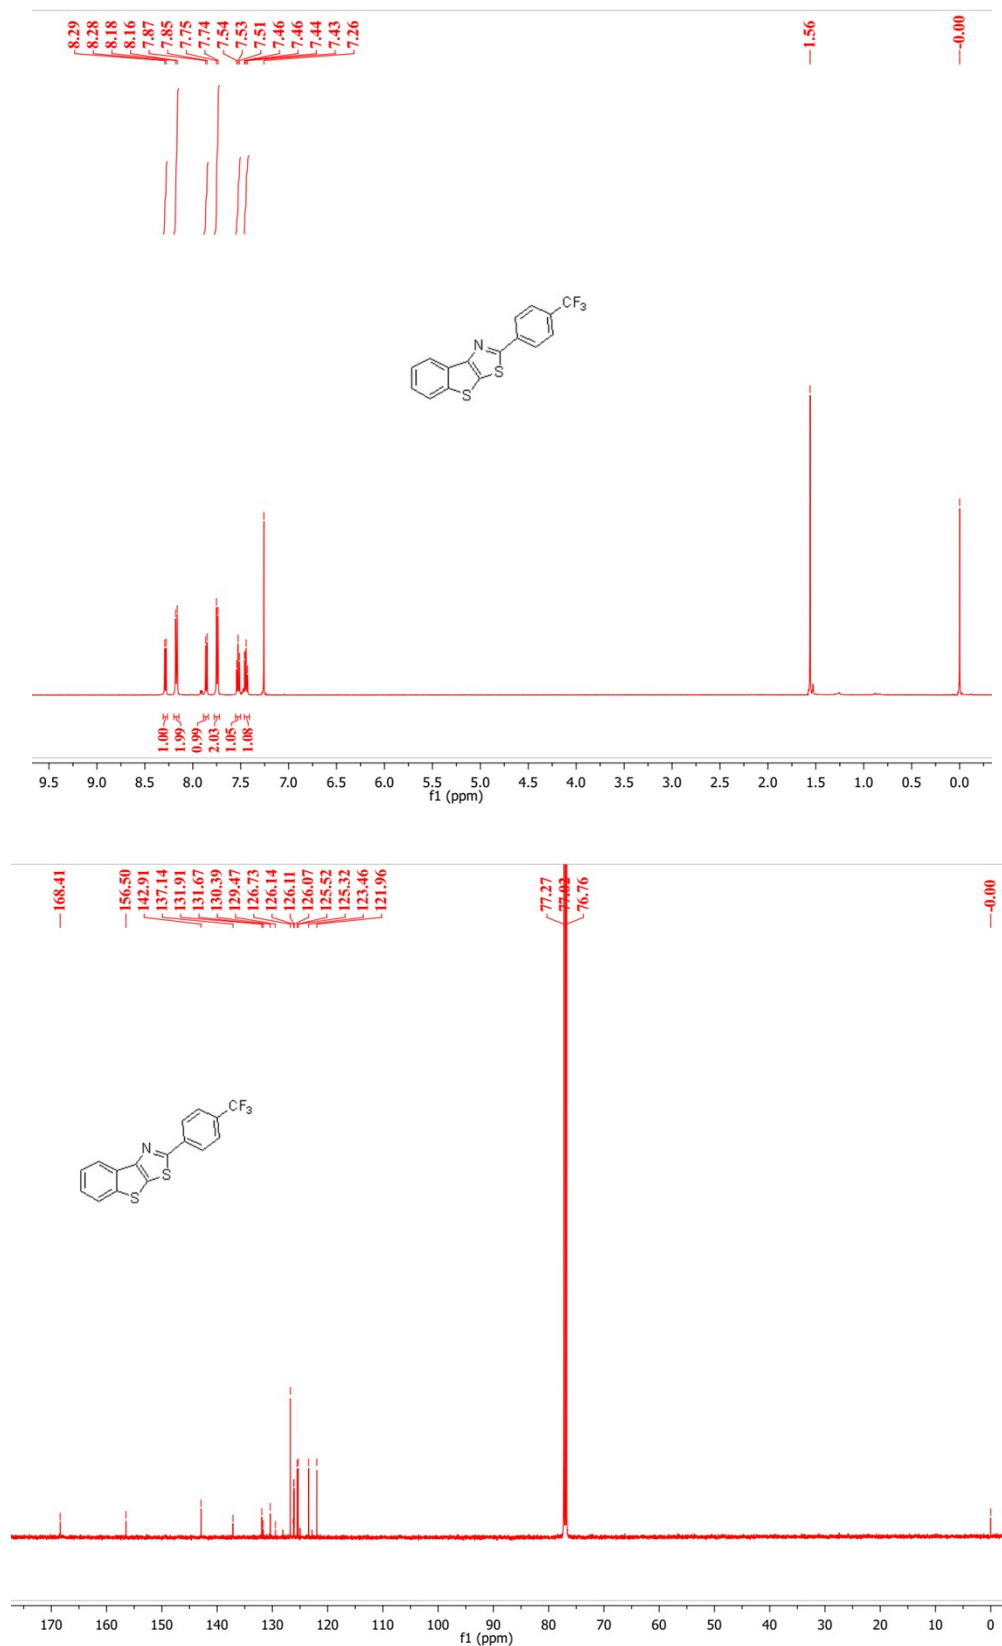

$^1\text{H}$  and  $^{13}\text{C}$  NMR spectra of **3aj**, Scheme 2

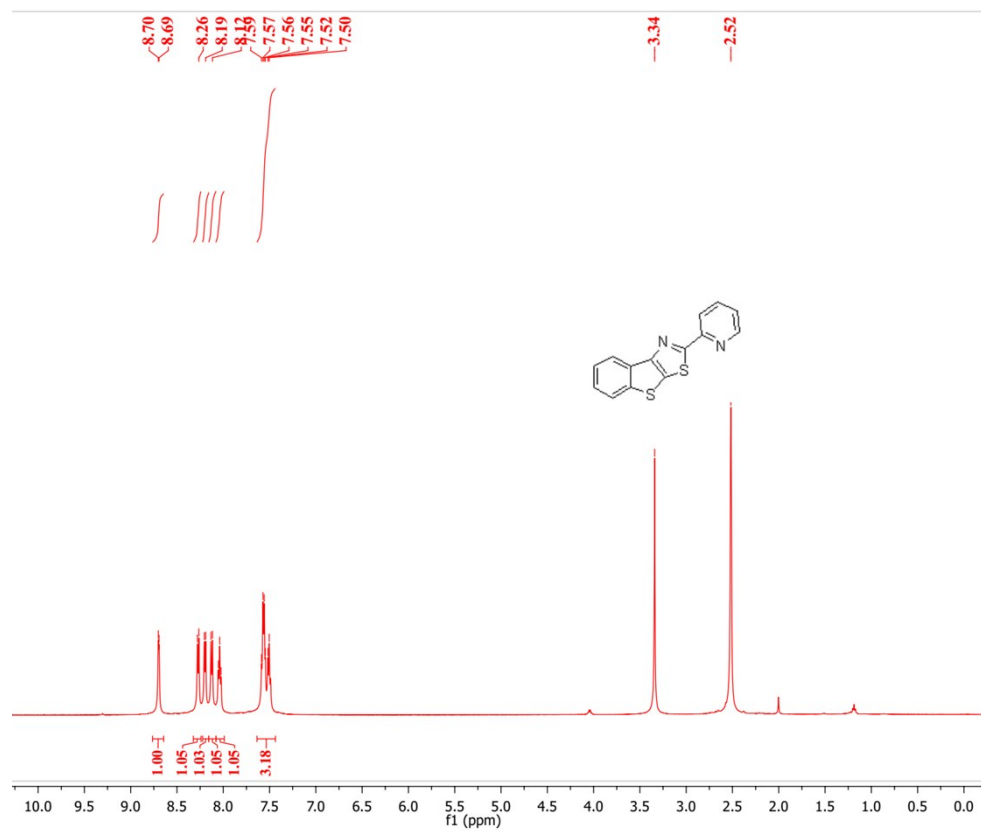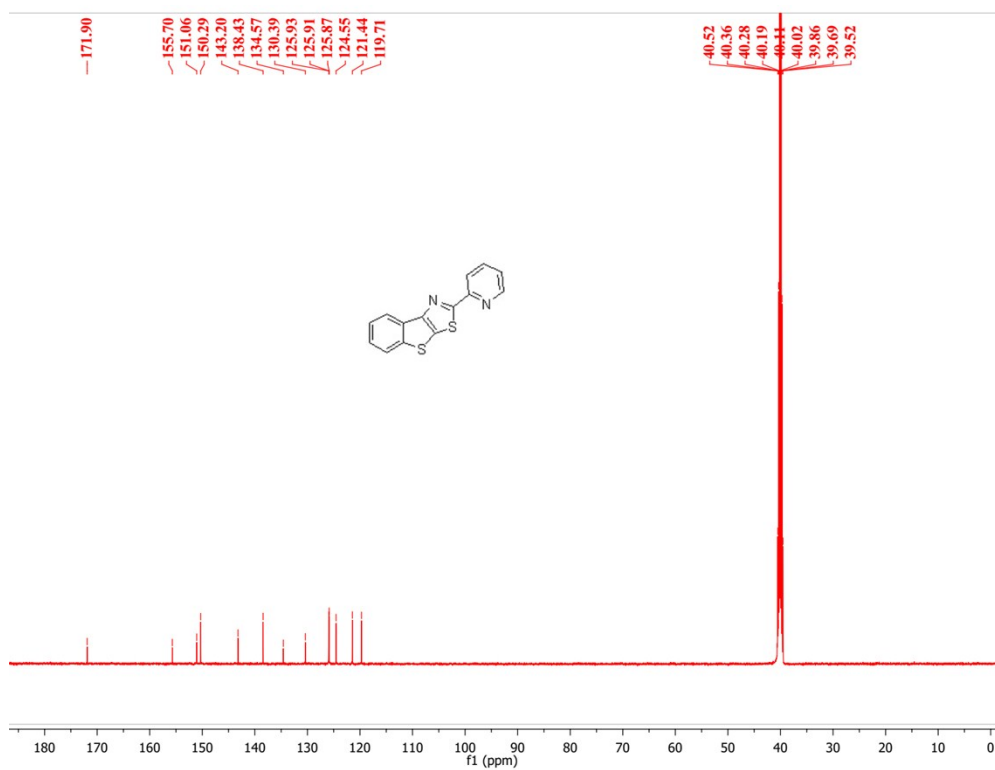

$^1\text{H}$  and  $^{13}\text{C}$  NMR spectra of **3ak**, Scheme 2

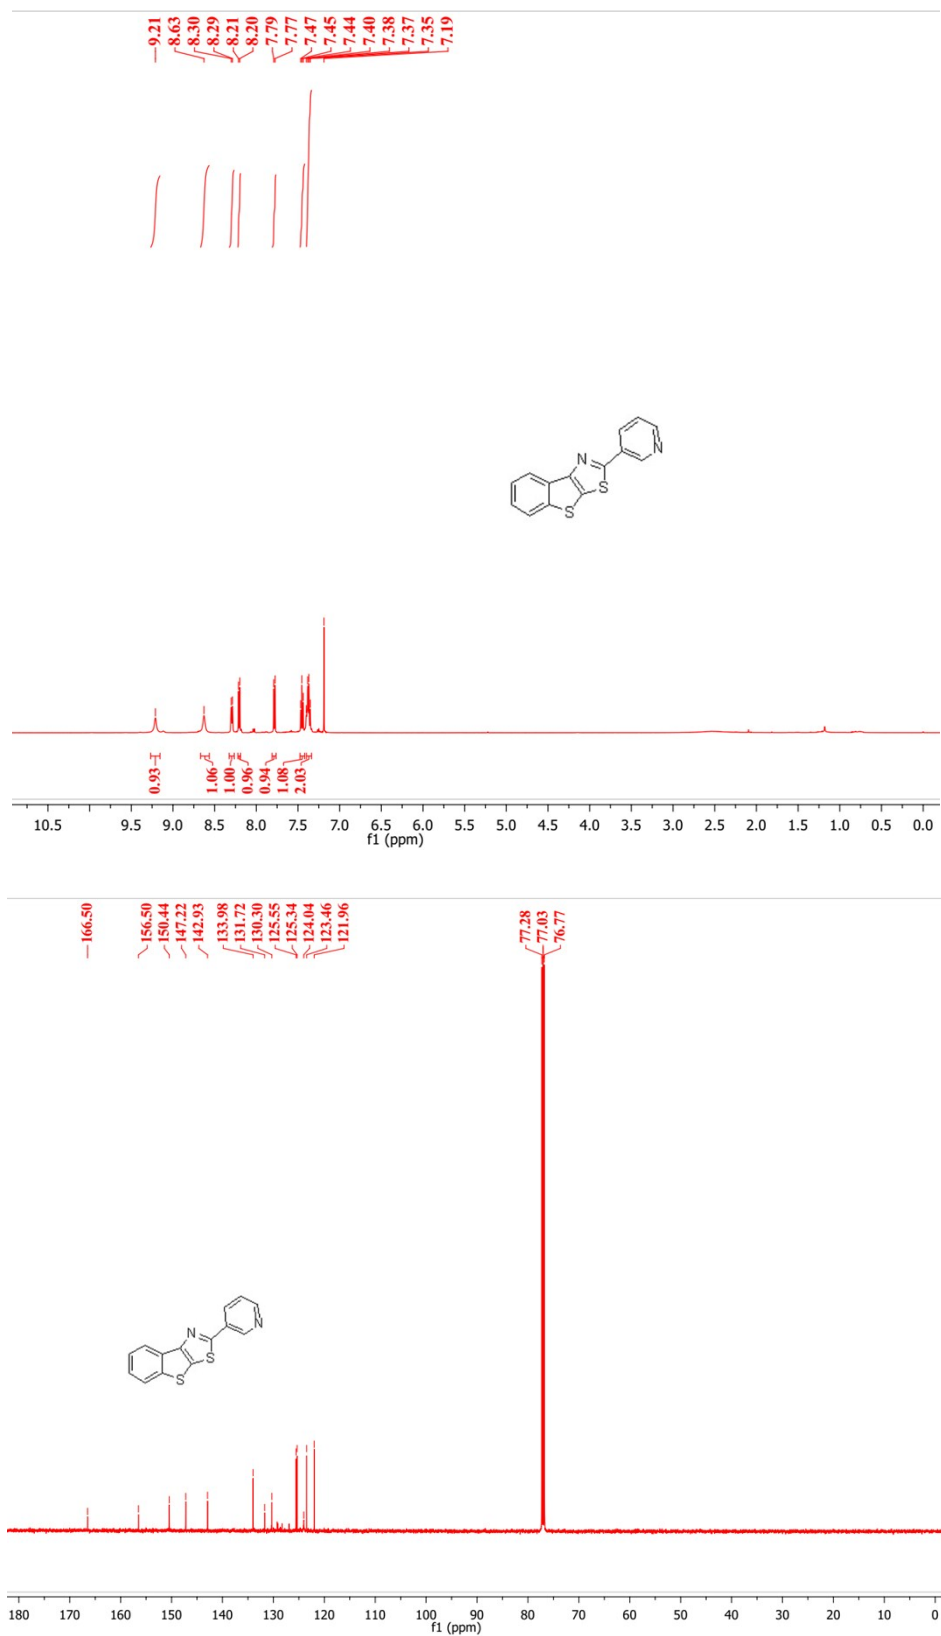

$^1\text{H}$  and  $^{13}\text{C}$  NMR spectra of **3al**, Scheme 2

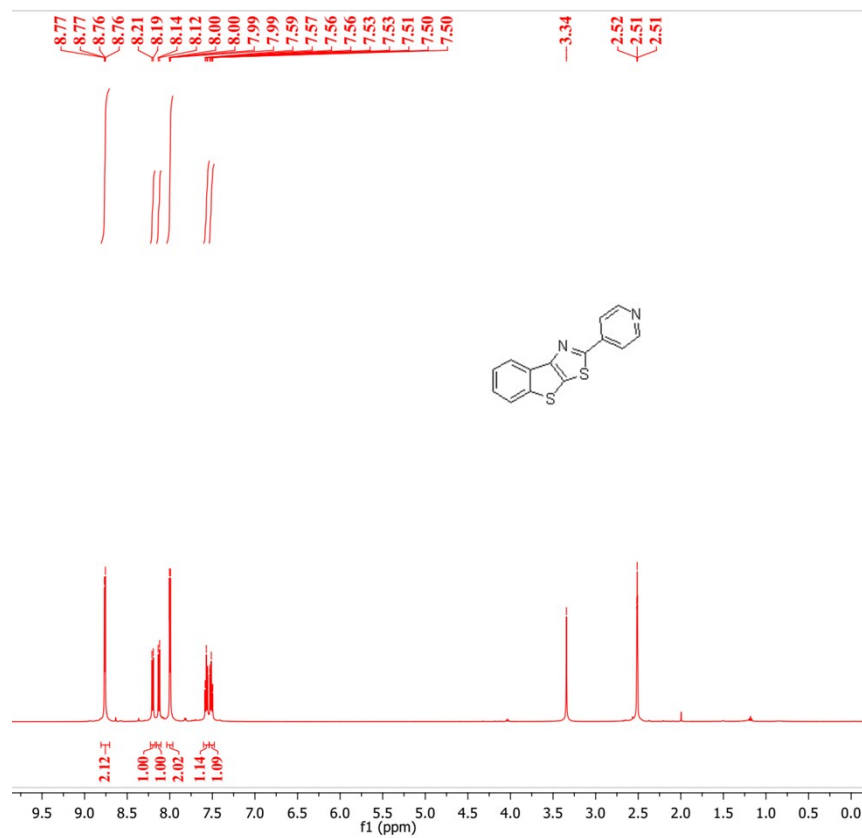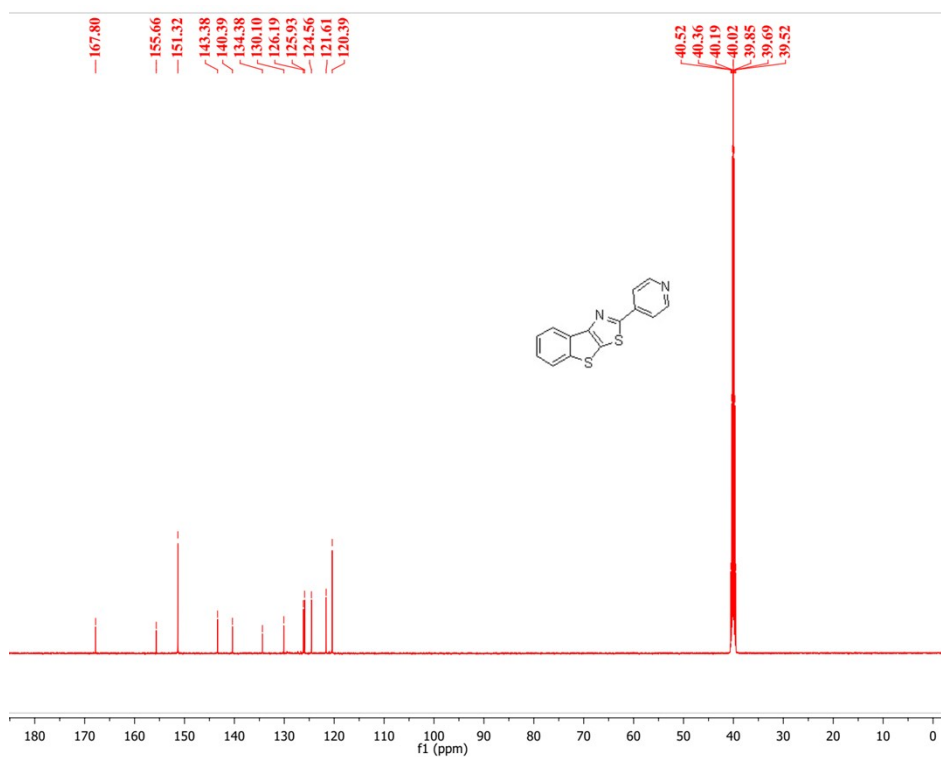

$^1\text{H}$  and  $^{13}\text{C}$  NMR spectra of **3ba**, Scheme 3

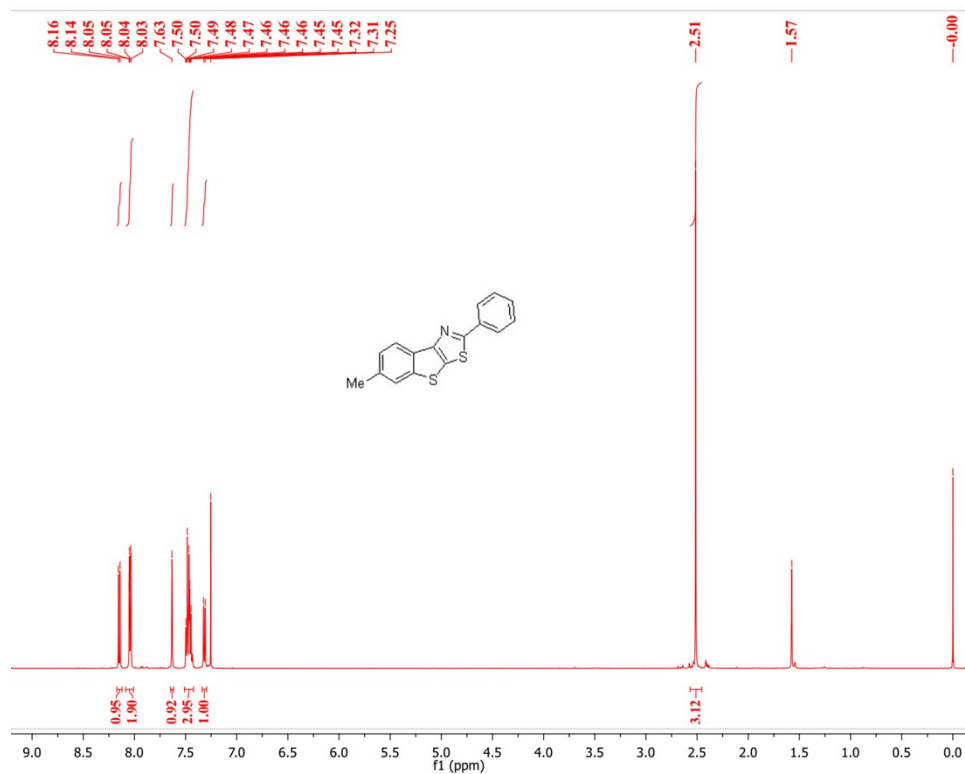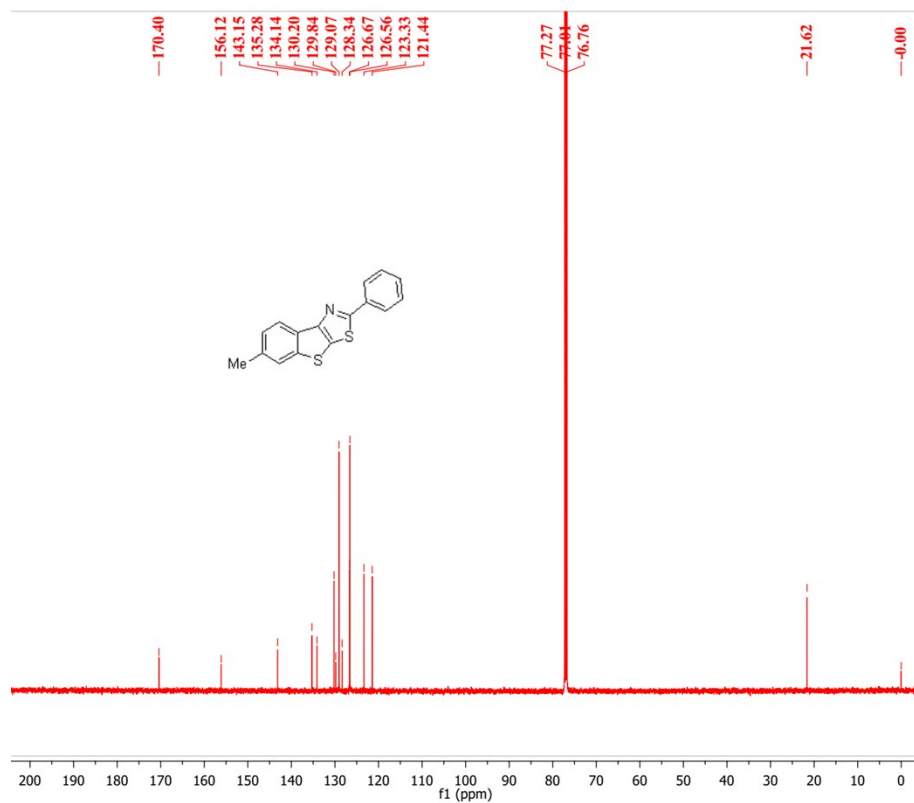

$^1\text{H}$  and  $^{13}\text{C}$  NMR spectra of **3ca**, Scheme 3

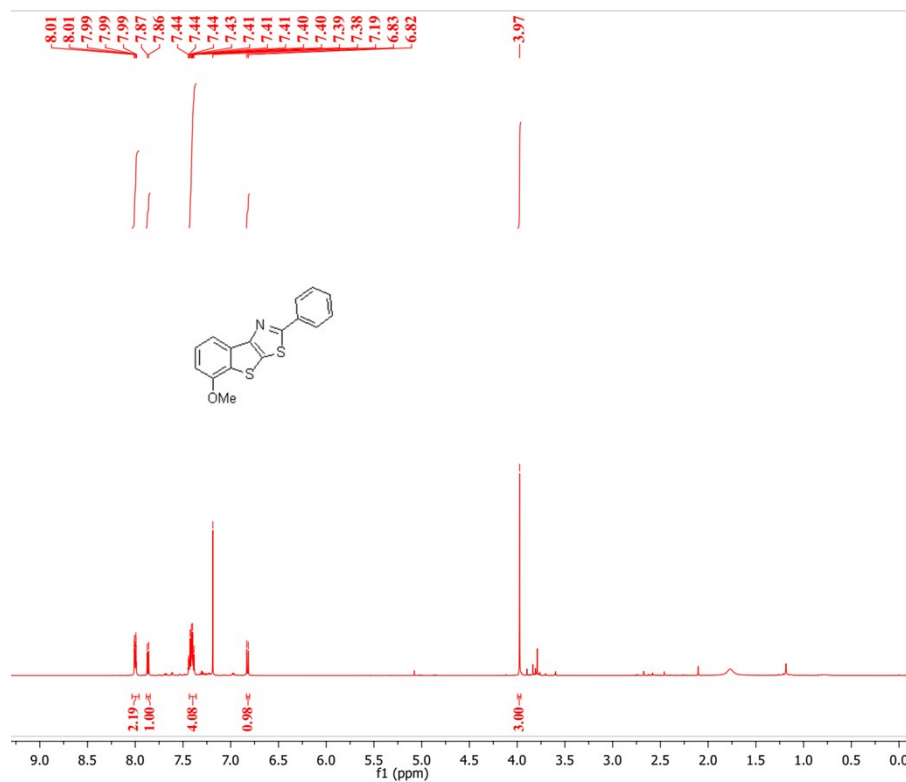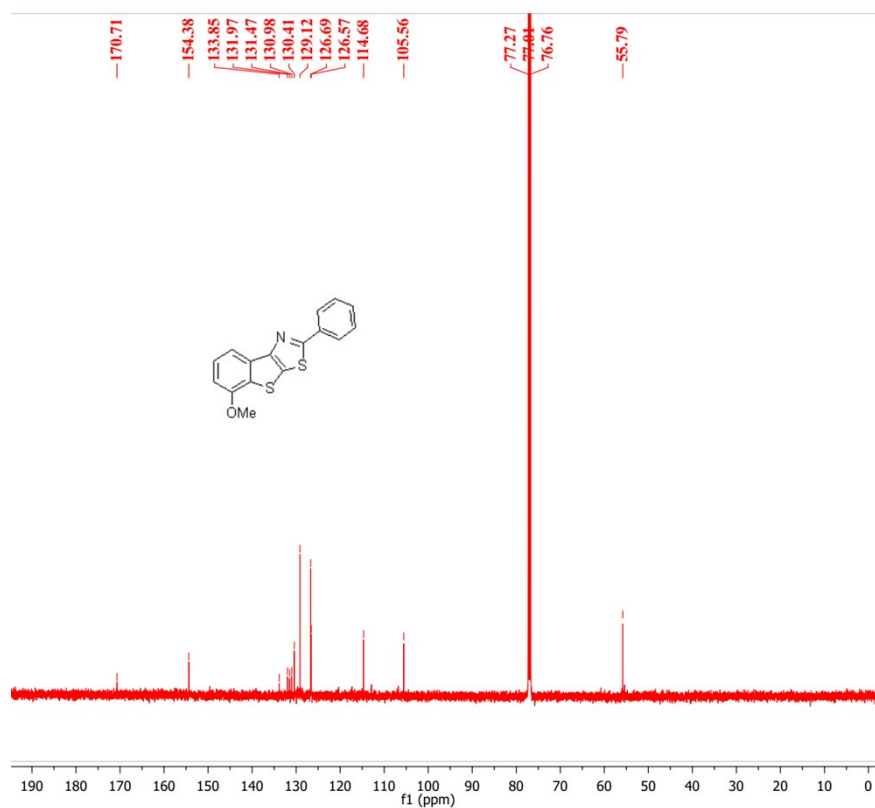

$^1\text{H}$  and  $^{13}\text{C}$  NMR spectra of **3da**, Scheme 3

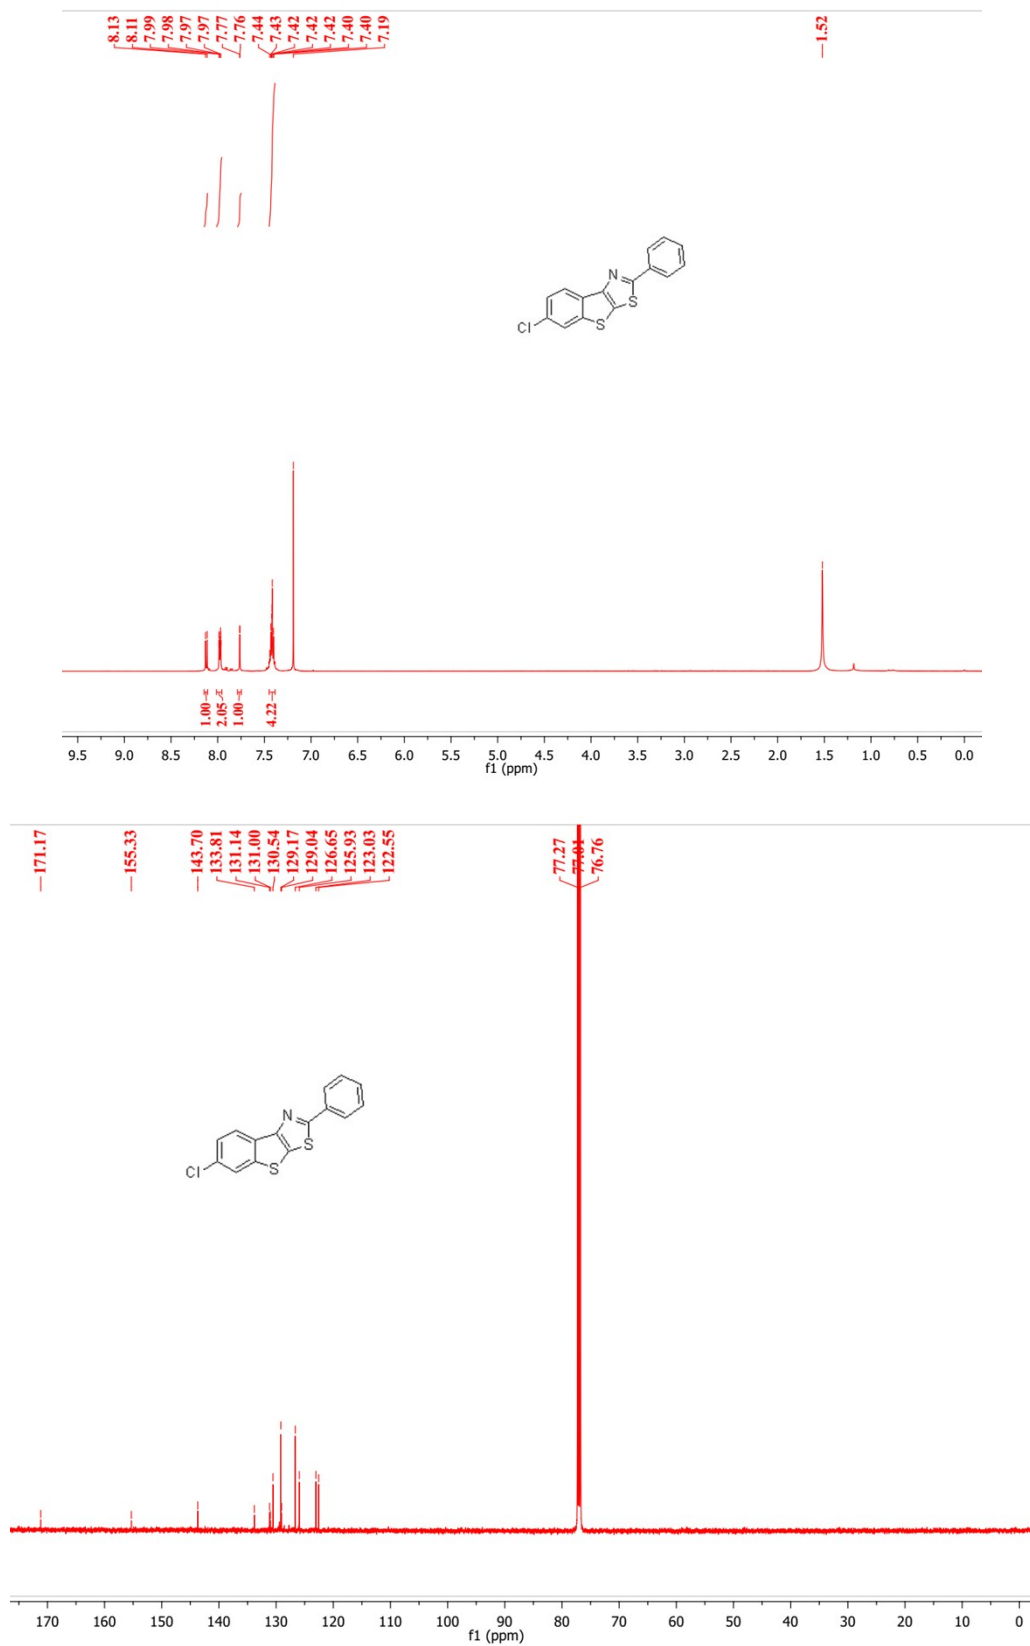



$^1\text{H}$  and  $^{13}\text{C}$  NMR spectra of **3ea**, Scheme 3

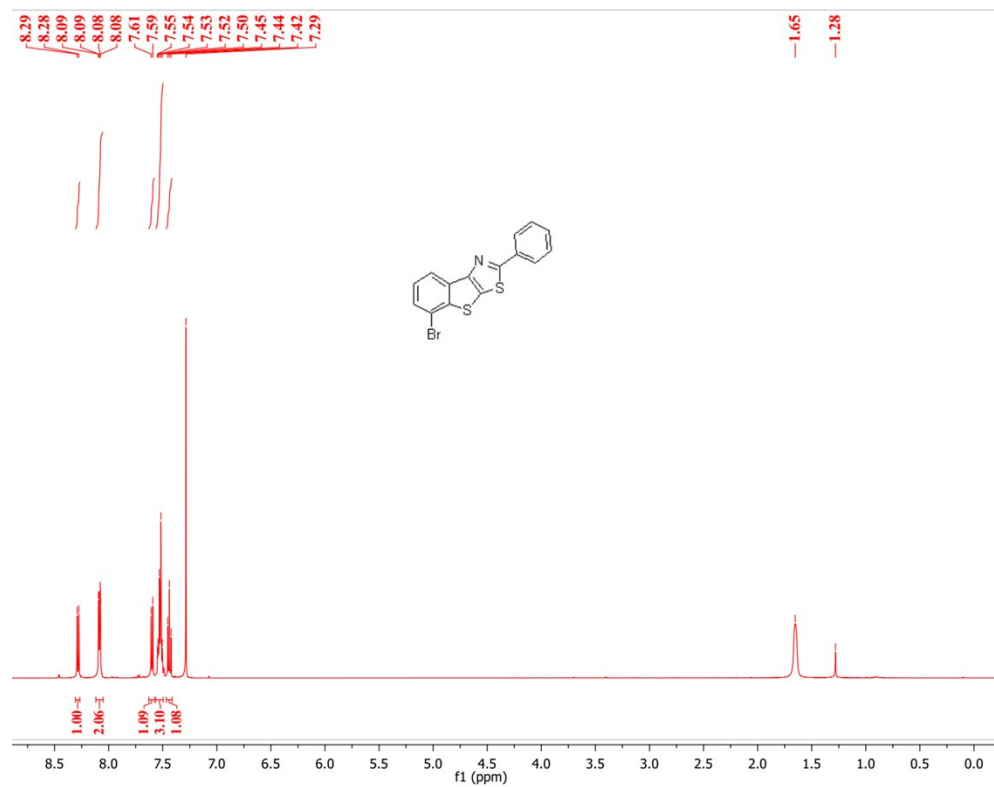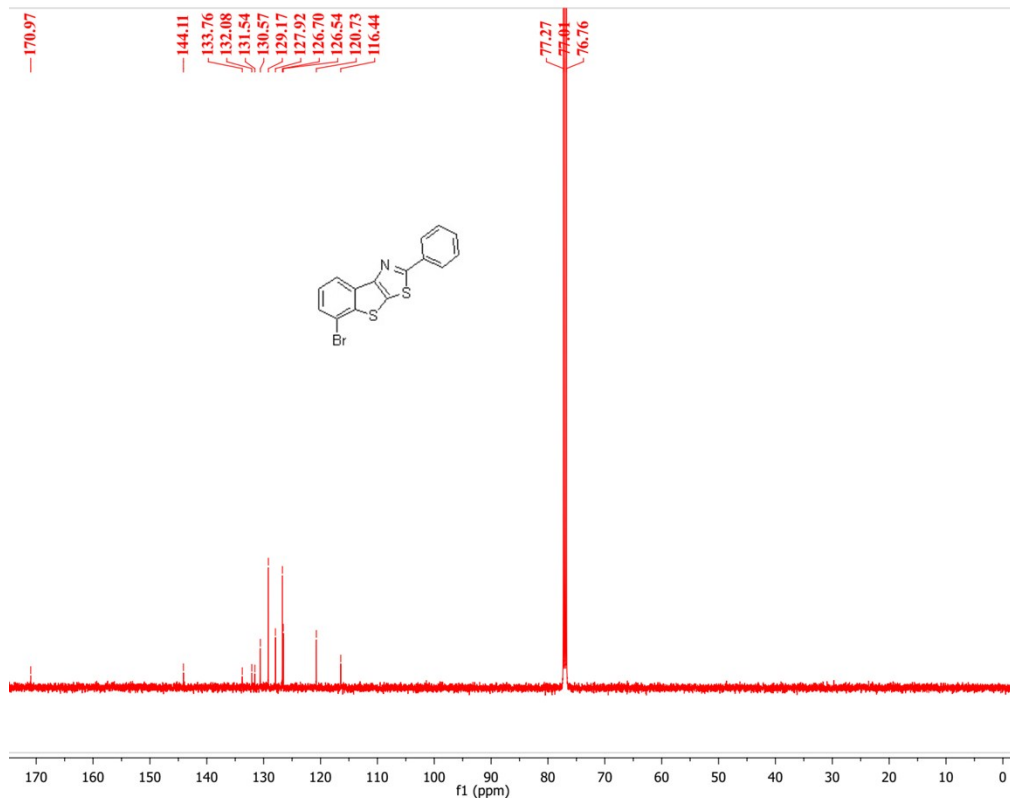

$^1\text{H}$  and  $^{13}\text{C}$  NMR spectra of **3fa**, Scheme 3

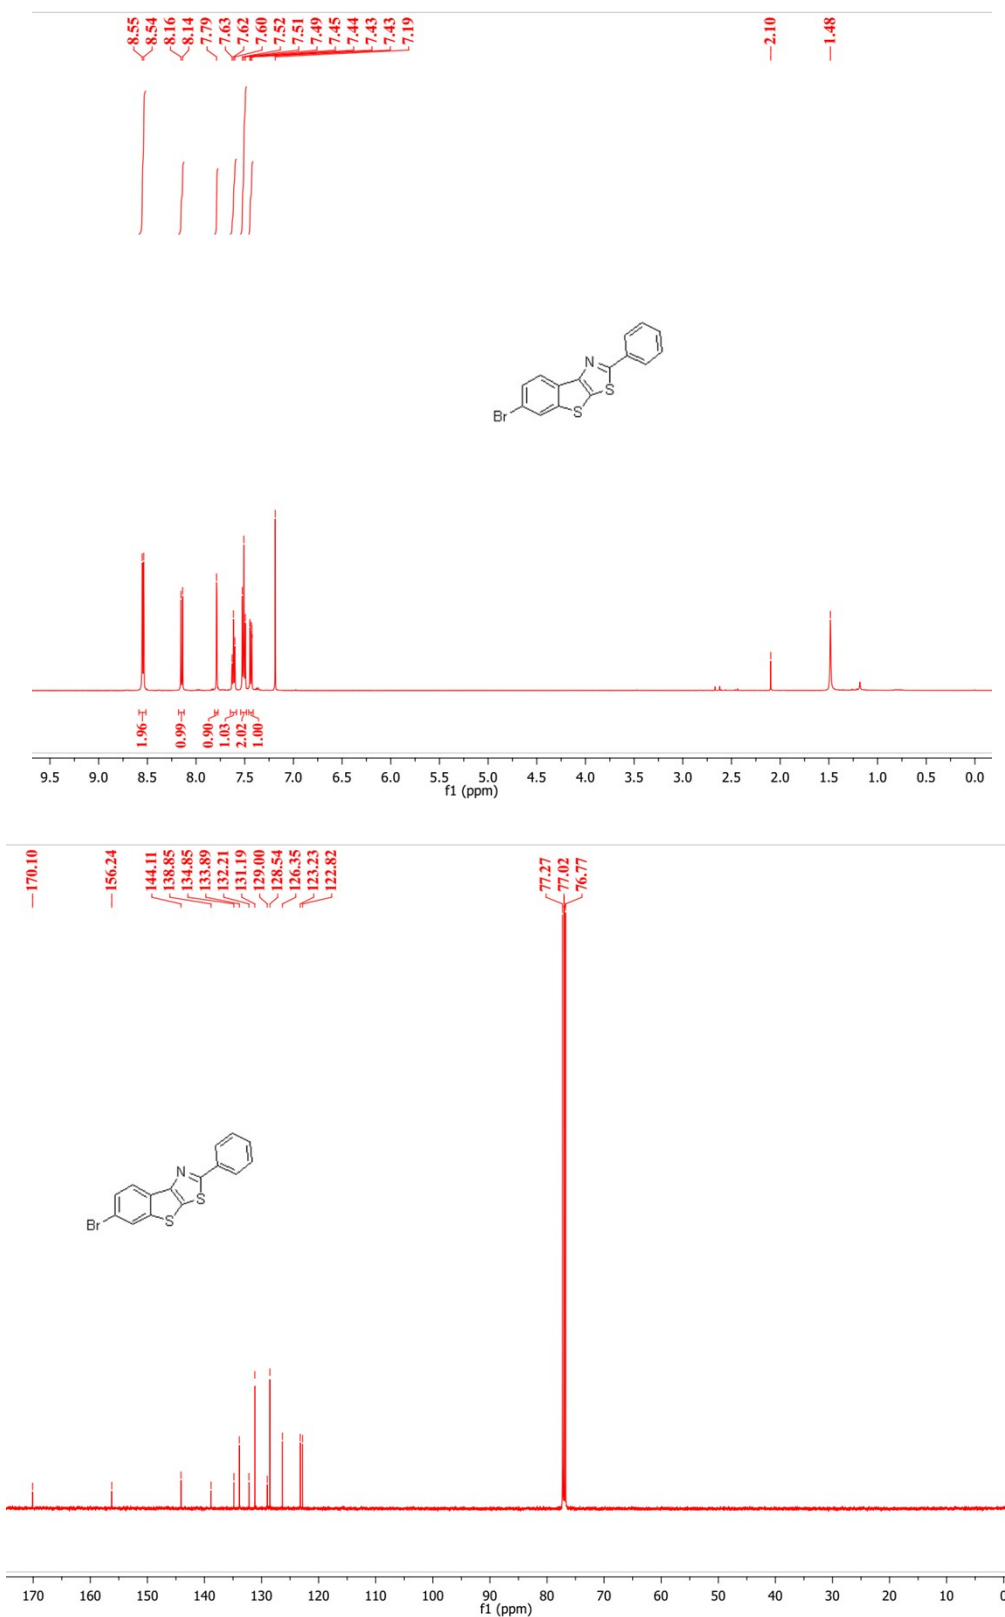

$^1\text{H}$  and  $^{13}\text{C}$  NMR spectra of **3ga**, Scheme 3

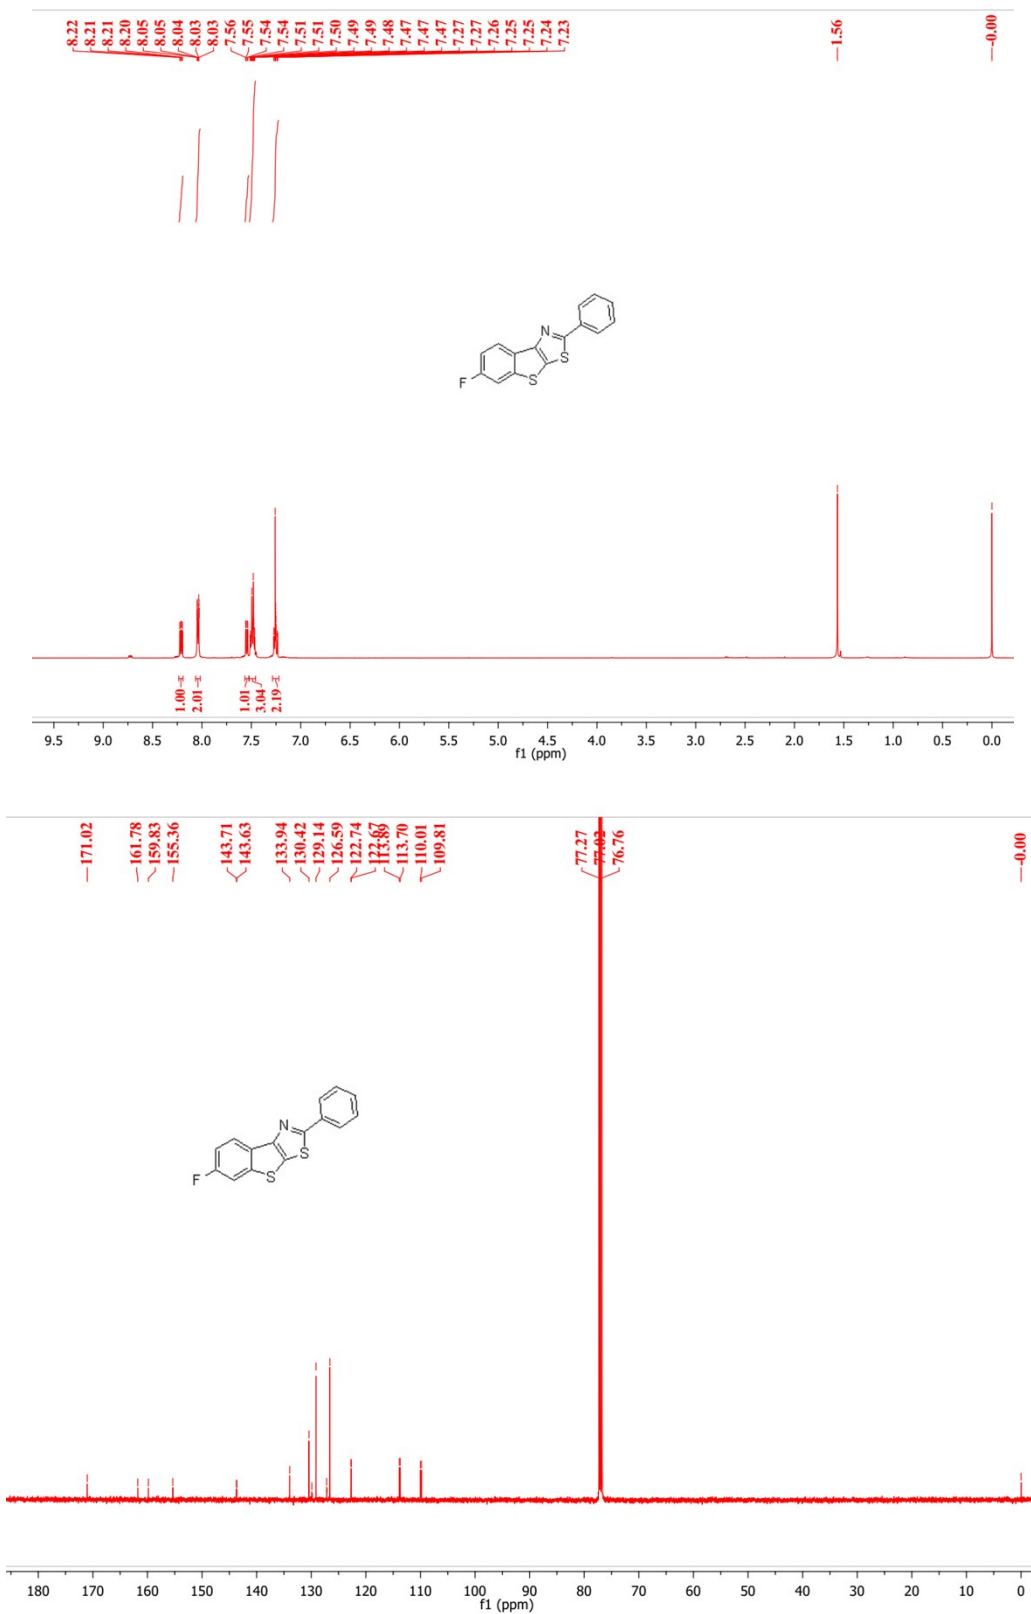

$^1\text{H}$  and  $^{13}\text{C}$  NMR spectra of **3ha**, Scheme 3

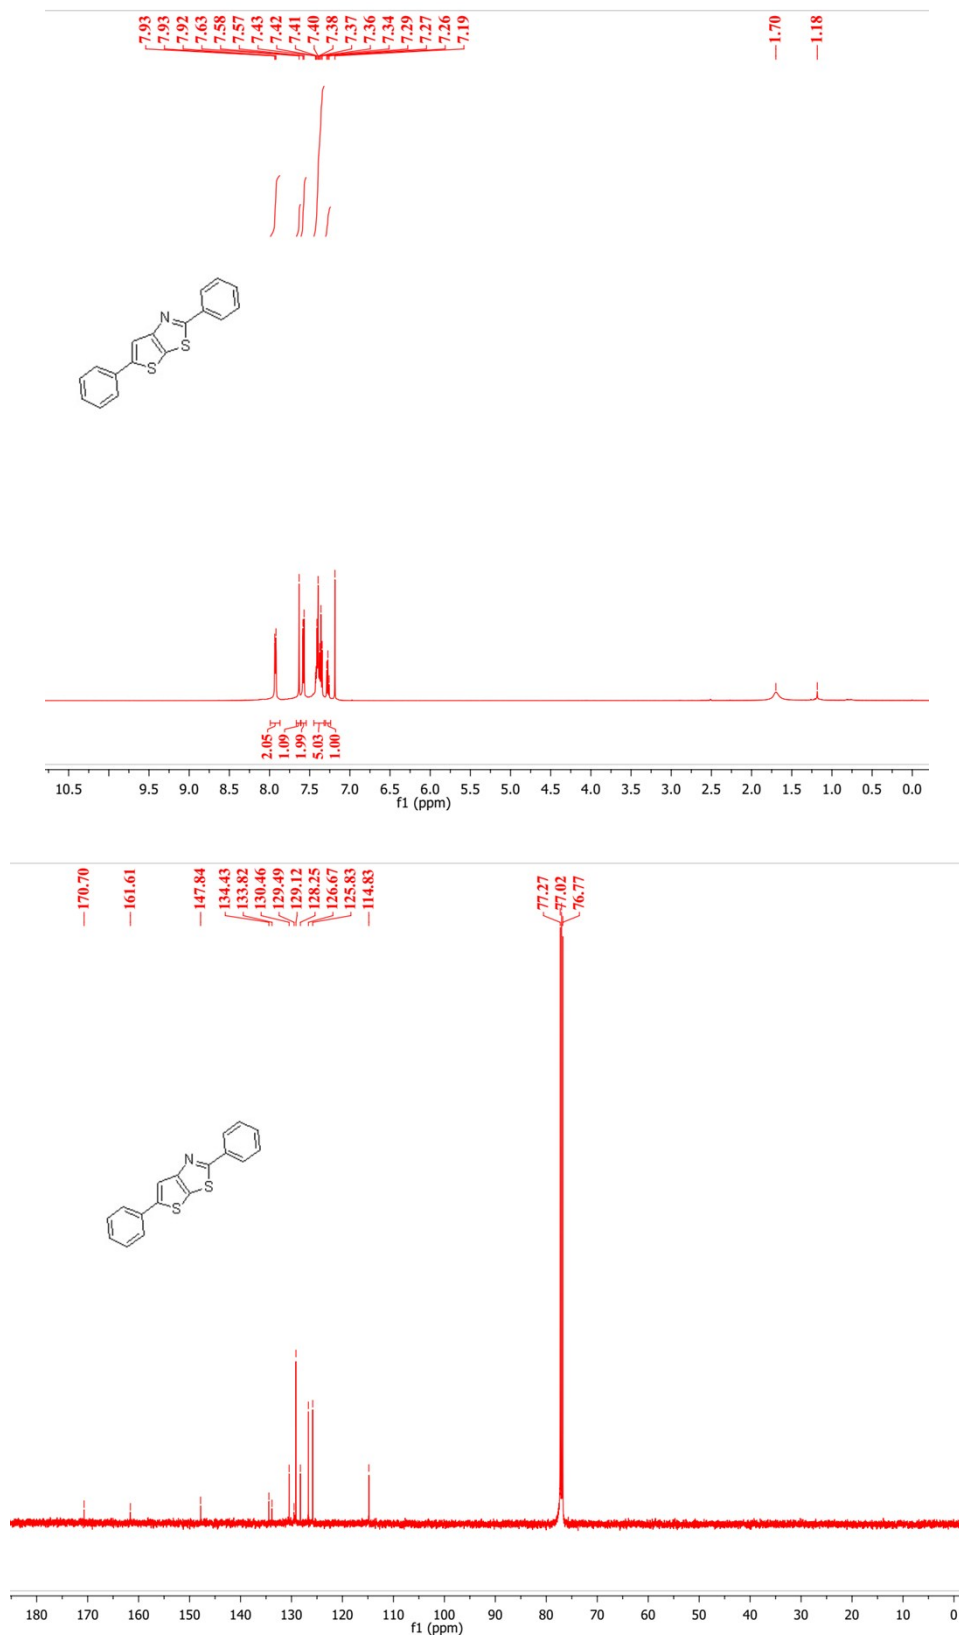

$^1\text{H}$  and  $^{13}\text{C}$  NMR spectra of **5g**, Scheme 4

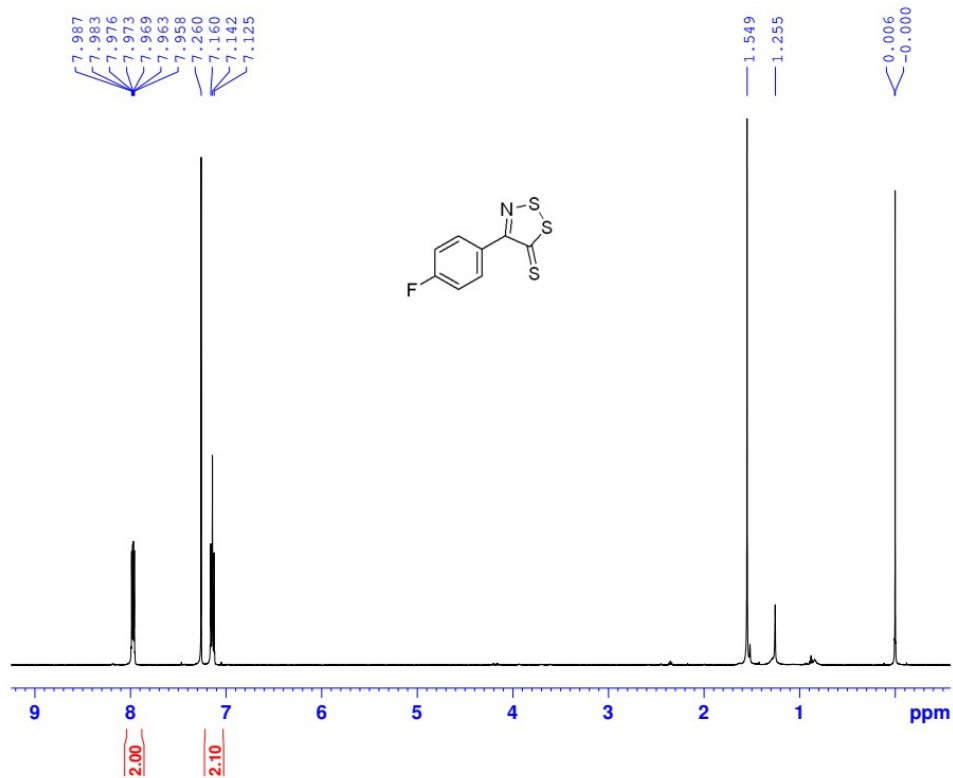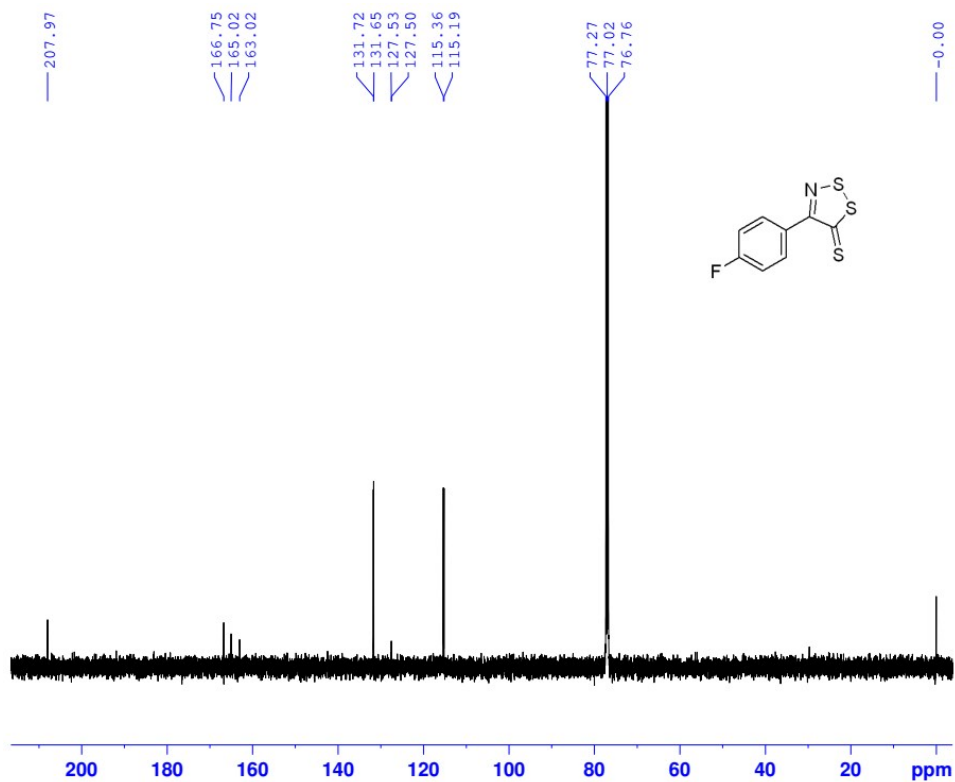

$^1\text{H}$  and  $^{13}\text{C}$  NMR spectra of 7, Scheme 5

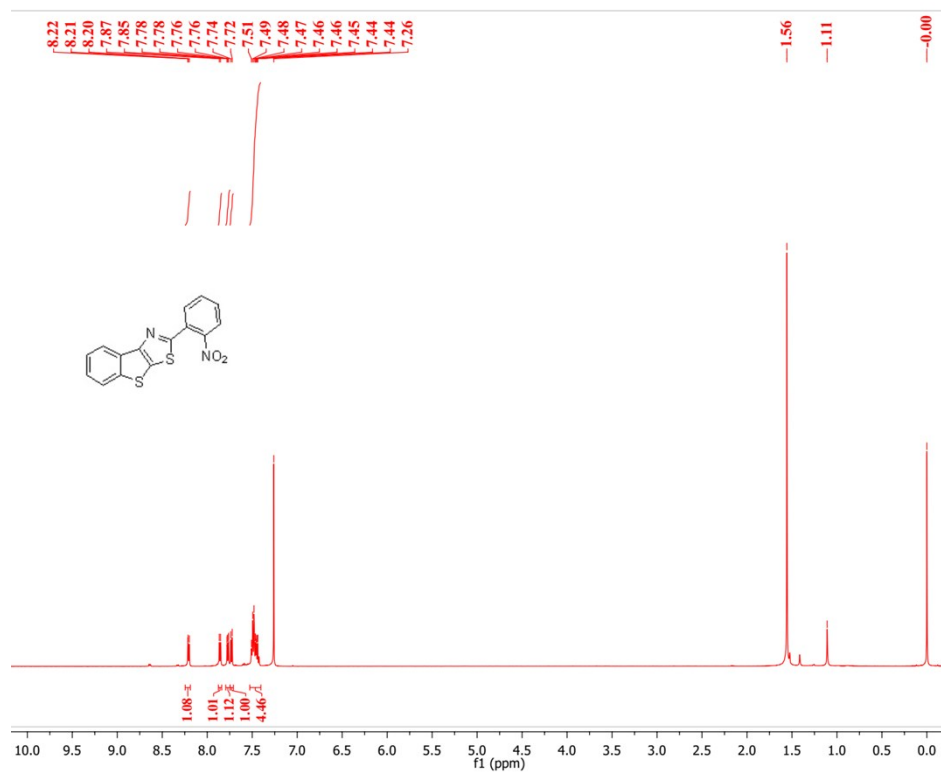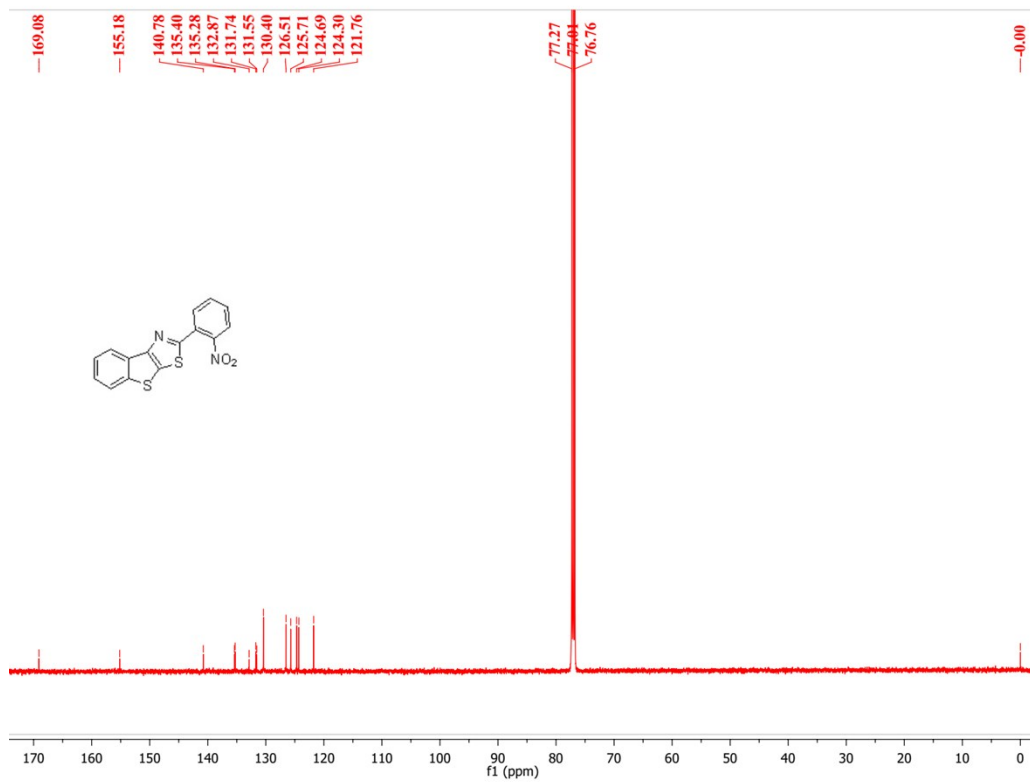

Supplement: d0ra00808g1.pdf [file d0ra00808g1.pdf]
